# Supplementary material
Source: PubMed Central journal article supplement (PMC4911894)
Supplement: NIHMS789165-supplement-Supplemental_Material.pdf [file NIHMS789165-supplement-Supplemental_Material.pdf]

## SUPPLEMENTAL MATERIAL

**Supplemental Table 1.** Retrograde procedures: technical success and successful crossing strategy according to whether interventional collaterals were present or not.

| Variable                              | Interventional collaterals<br>present (78.3%) | No interventional<br>collaterals (21.7%) | <i>p</i> |
|---------------------------------------|-----------------------------------------------|------------------------------------------|----------|
| <b>Technical success (%)</b>          | 89.6                                          | 71.6                                     | <0.001   |
| <b>Successful crossing strategy</b>   |                                               |                                          |          |
| Antegrade wire escalation (%)         | 7.0                                           | 17.5                                     |          |
| Antegrade dissection/ re-entry<br>(%) | 13.0                                          | 50.8                                     | <0.001   |
| Retrograde (%)                        | 80.0                                          | 31.8                                     |          |

**Supplemental Table 2.** Retrograde procedures: incidence of major adverse cardiovascular events and coronary perforation according to whether an epicardial collateral was used or not.

| Variable                        | Epicardial collateral<br>used (32.5%) | Epicardial collateral<br>not used (67.5%) | <i>p</i> |
|---------------------------------|---------------------------------------|-------------------------------------------|----------|
| <b>MACE (%)</b>                 | 4.0                                   | 4.4                                       | 0.832    |
| <b>Death (%)</b>                | 0.6                                   | 0.8                                       | 0.999    |
| <b>MI (%)</b>                   | 1.7                                   | 2.2                                       | 0.999    |
| <b>Stroke (%)</b>               | 0.6                                   | 0.3                                       | 0.544    |
| <b>Pericardiocentesis (%)</b>   | 1.1                                   | 1.4                                       | 0.999    |
| <b>Emergency re-PCI (%)</b>     | 0.6                                   | 0.6                                       | 0.999    |
| <b>Emergency CABG (%)</b>       | 0.0                                   | 0.0                                       | -        |
| <b>Coronary perforation (%)</b> | 4.6                                   | 5.8                                       | 0.564    |

CABG, coronary artery bypass graft surgery; MACE, major adverse cardiovascular events; MI, myocardial infarction; PCI, percutaneous coronary intervention.
